# Supplementary material for: Evolution of charge pathways through amorphous aluminum–cerium electrode for stable organic photovoltaics
Source: Royal Society of Chemistry journal article supplement (doi:10.1039/d5tc00173k), 2025-01-01
Supplement: d5tc00173k1.pdf [file d5tc00173k1.pdf]

## Electronic Supplementary Information

# Evolution of Charge Pathways Through Amorphous Aluminum-Cerium Electrode for Stable Organic Photovoltaics

*Jae Sang Cho<sup>a</sup>, Woongsik Jang<sup>b</sup>, Keum Hwan Park<sup>c</sup>, and Dong Hwan Wang<sup>a,b\*</sup>*

<sup>a</sup>Department of Intelligent Semiconductor Engineering, Chung-Ang University, 84 Heukseok-ro, Dongjak-gu, Seoul 06974, Republic of Korea

<sup>b</sup>School of Integrative Engineering, Chung-Ang University, 84 Heukseok-ro, Dongjak-gu, Seoul 06974, Republic of Korea

<sup>c</sup>Display Research Center Korea Electronics Technology Institute 25 Saenari-ro, Bundang-gu, Seongnam-si, Gyeonggi-do, 13509, Republic of Korea

---

\* Corresponding author, E-mail address: king0401@cau.ac.kr (Prof. D.H. Wang)

**Table S1** Summary of electrical parameters of OPV devices with crystalline Al and amorphous AlCe electrodes before and after aging in ambient air for 24 hours.

|                        | <b>V<sub>oc</sub></b><br><b>(V)</b> | <b>J<sub>sc</sub></b><br><b>(mA/cm<sup>2</sup>)</b> | <b>J<sub>sc, EQE</sub></b><br><b>(mA/cm<sup>2</sup>)</b> | <b>FF</b> | <b>PCE</b><br><b>(%)</b> |
|------------------------|-------------------------------------|-----------------------------------------------------|----------------------------------------------------------|-----------|--------------------------|
| <b>Ag (Pristine)</b>   | 0.928                               | 17.21                                               | 19.79                                                    | 0.63      | 10.06                    |
| <b>Ag (24 h)</b>       | 0.718                               | 3.92                                                | -                                                        | 0.28      | 0.79                     |
| <b>AlCe (Pristine)</b> | 1.026                               | 16.95                                               | 17.02                                                    | 0.57      | 9.92                     |
| <b>AlCe (24 h)</b>     | 1.121                               | 18.06                                               | 17.27                                                    | 0.50      | 10.03                    |

### (a) Crystalline Al

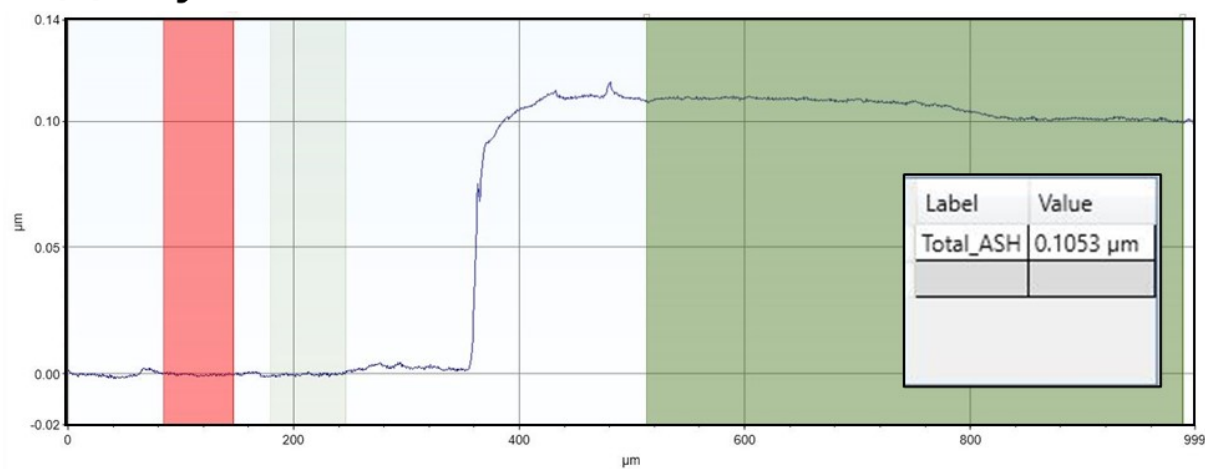

### (b) Amorphous AlCe

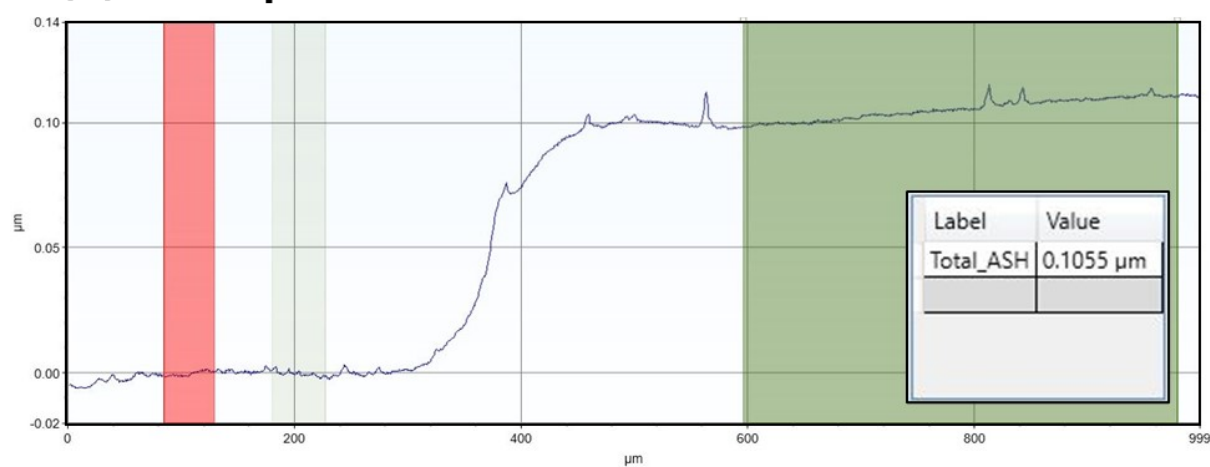

**Fig. S1** Thickness measurement of sputtered crystalline Al and amorphous AlCe thin films with Alpha-step surface profiler showing that the electrodes with thicknesses of 100nm were obtained.

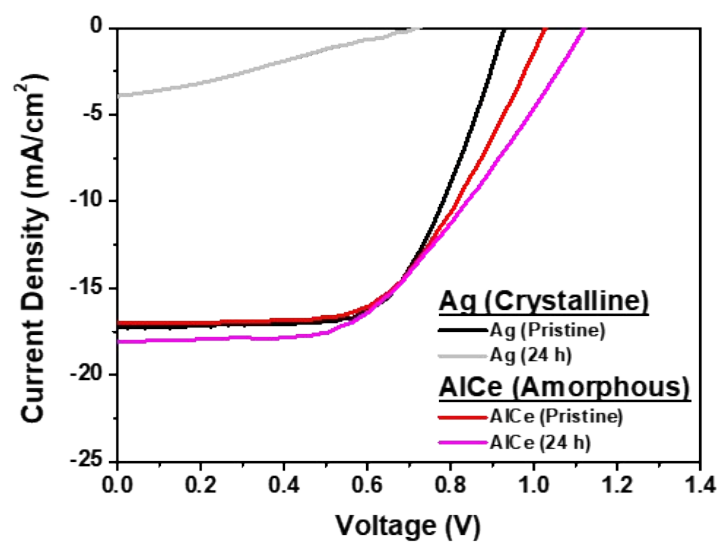

**Fig. S2** J-V curves obtained from OPV devices with Ag and AlCe electrode, with current density (y-axis) in linear scale.

**(a) Crystalline Al**

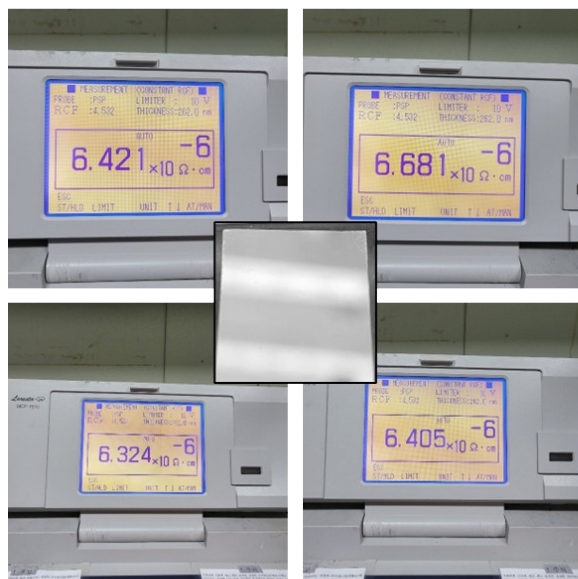

**Avg. resistivity :  $6.46 \mu\Omega \cdot \text{cm}$**

**(b) Amorphous AlCe**

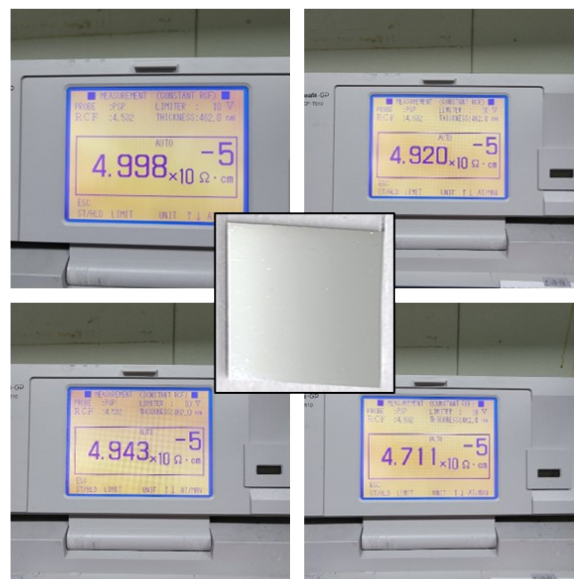

**Avg. resistivity :  $48.9 \mu\Omega \cdot \text{cm}$**

**Fig. S3 Resistivity measurements of (a) crystalline Al and (b) amorphous AlCe electrode**

**(a) Ag on ITO**

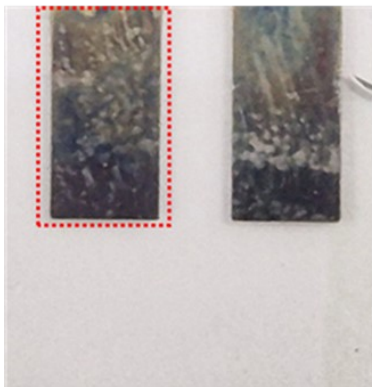

**(b) OPV w/ Ag**

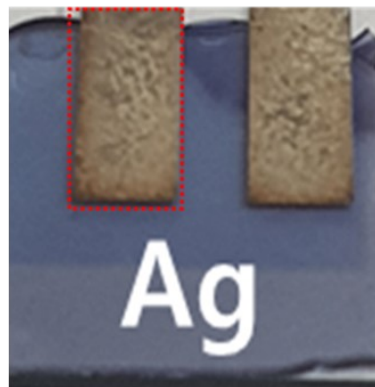

**(c) AlCe on ITO**

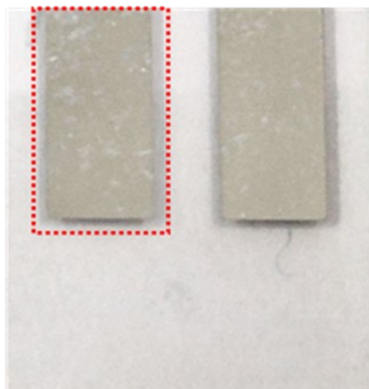

**(d) OPV w/ AlCe**

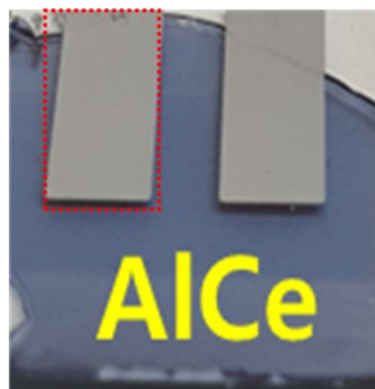

**Fig. S4** Photographs of electrodes after storage in air for 1000 h. (a) Ag on ITO substrate, (b) Ag on OPV structure, (ITO/ZnO/PCE10:IEICO-4F/MoO<sub>x</sub>) (c) AlCe on ITO substrate, and (d) AlCe on OPV structure

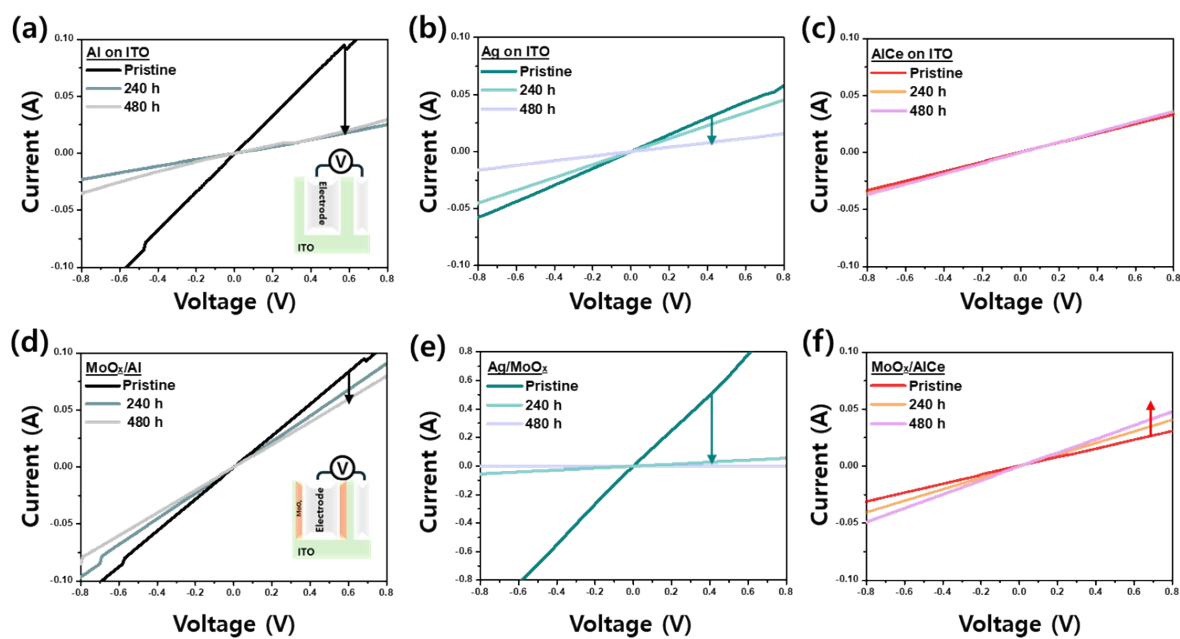

**Fig. S5** I-V analyses on electronic conductivity at the interface between the electrodes (Al, Ag, and AlCe) and ITO (a, b, c) and the electrodes and MoO<sub>3</sub> layer (d, e, f) during storage in ambient air. The inset shows the sample structure used for the analyses.
